# Supplementary material for: Atomistic understanding of enhanced selectivity in photocatalytic oxidation of benzyl alcohol to benzaldehyde using graphitic carbon nitride loaded with single copper atoms
Source: Royal Society of Chemistry journal article supplement (doi:10.1039/d4nr01610f), 2024-01-01
Supplement: d4nr01610f1.pdf [file d4nr01610f1.pdf]

# SUPPLEMENTARY INFORMATION FOR

## Atomistic Understanding of Enhanced Selectivity in Photocatalytic Oxidation of Benzyl Alcohol to Benzaldehyde Using Graphitic Carbon Nitride Loaded with Single Copper Atoms

### A. Determination of photocatalytic performance

The photocatalytic performance, i.e., BA conversion, BAL yield, and BAL selectivity, was calculated using the following equations.

$$\text{Conversion (\%)} = \left( \frac{C_0 - C_r}{C_0} \right) \times 100 \quad (1)$$

$$\text{Yield (\%)} = \left( \frac{C_p}{C_0} \right) \times 100 \quad (2)$$

$$\text{Selectivity (\%)} = \left( \frac{C_p}{C_0 - C_r} \right) \times 100 \quad (3)$$

$$\text{Aromatic balance (\%)} = \left( \frac{C_r + C_p}{C_0} \right) \times 100 \quad (4)$$

where  $C_0$  is the initial BA concentration ( $\text{mmol L}^{-1}$ ).  $C_r$  and  $C_p$  are the concentration of reactant (BA) and product (BAL) when sampling, respectively.

### B. Experimental results

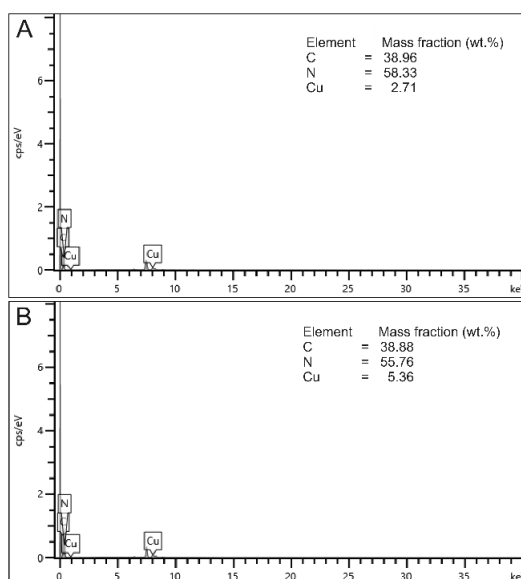

Figure S1. EDS spectra of (A) 3Cu-CN and (B) 6Cu-CN.

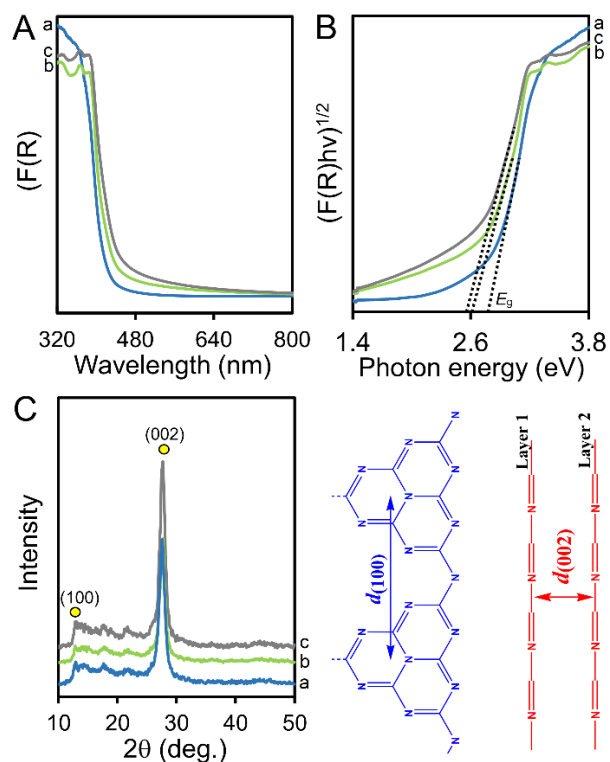

**Figure S2.** (A) DR spectra, (B) Tauc's plots, and (C) XRD patterns with the structural assignment of the diffraction peaks of (a) CN, (b) 3Cu-CN, and (c) 6Cu-CN.

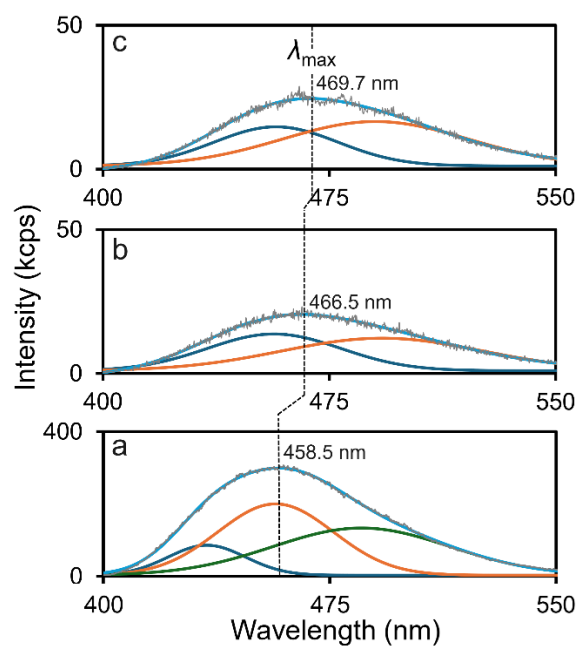

**Figure S3.** PL spectra of (a) CN, (b) 3Cu-CN, and (c) 6Cu-CN.

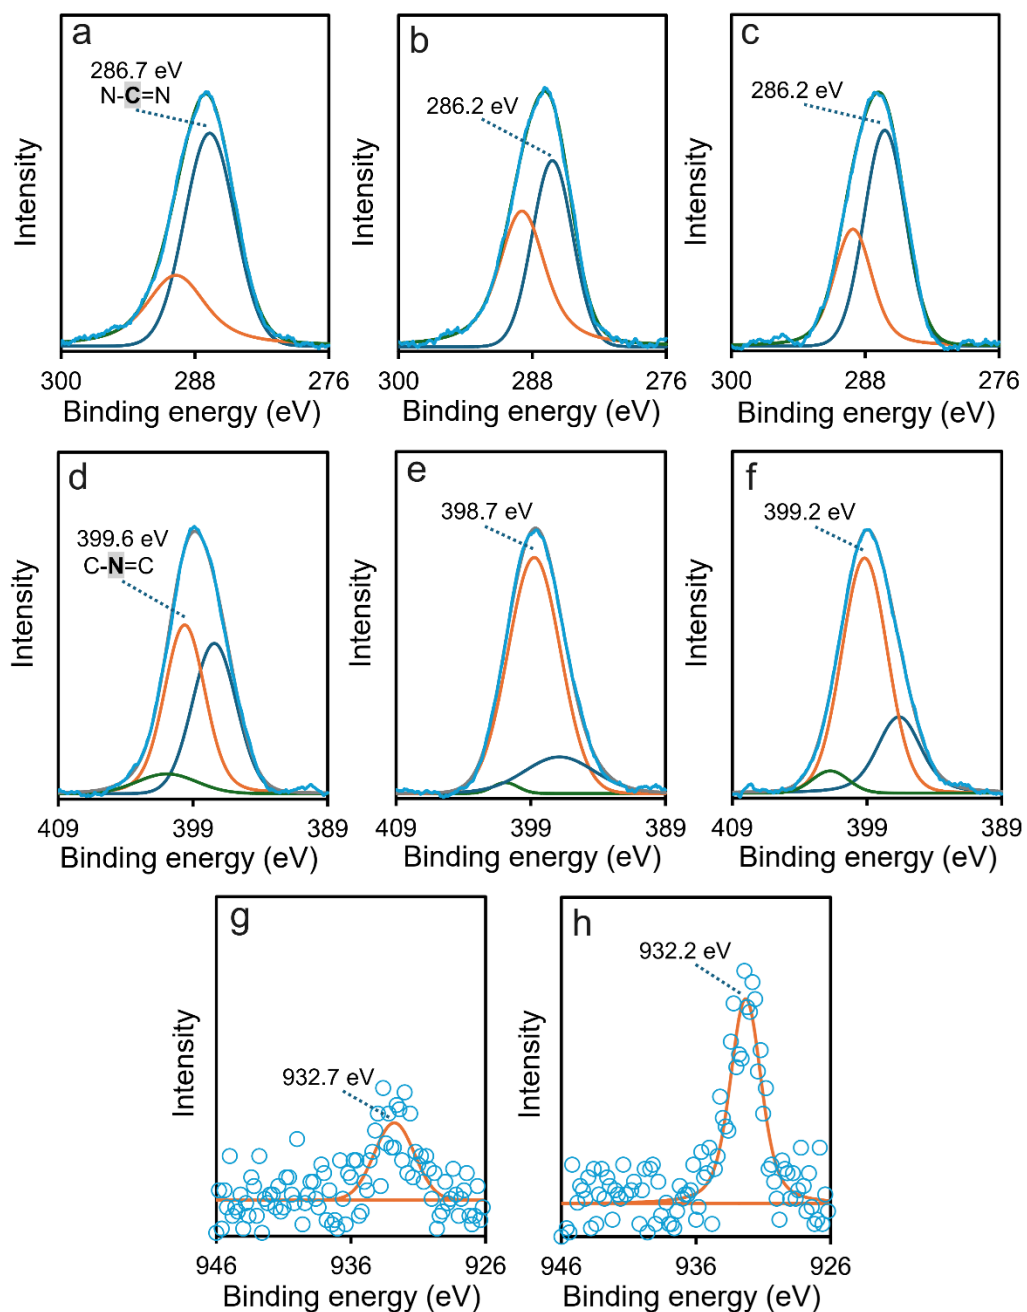

**Figure S4.** XPS spectra of CN at (a) C 1s and (d) N 1s regions, 3Cu-CN at (b) C 1s, (e) N 1s, and (g) Cu 2p<sub>3/2</sub>, and 6Cu-CN at (c) C 1s, (f) N 1s, and (h) Cu 2p<sub>3/2</sub> regions.

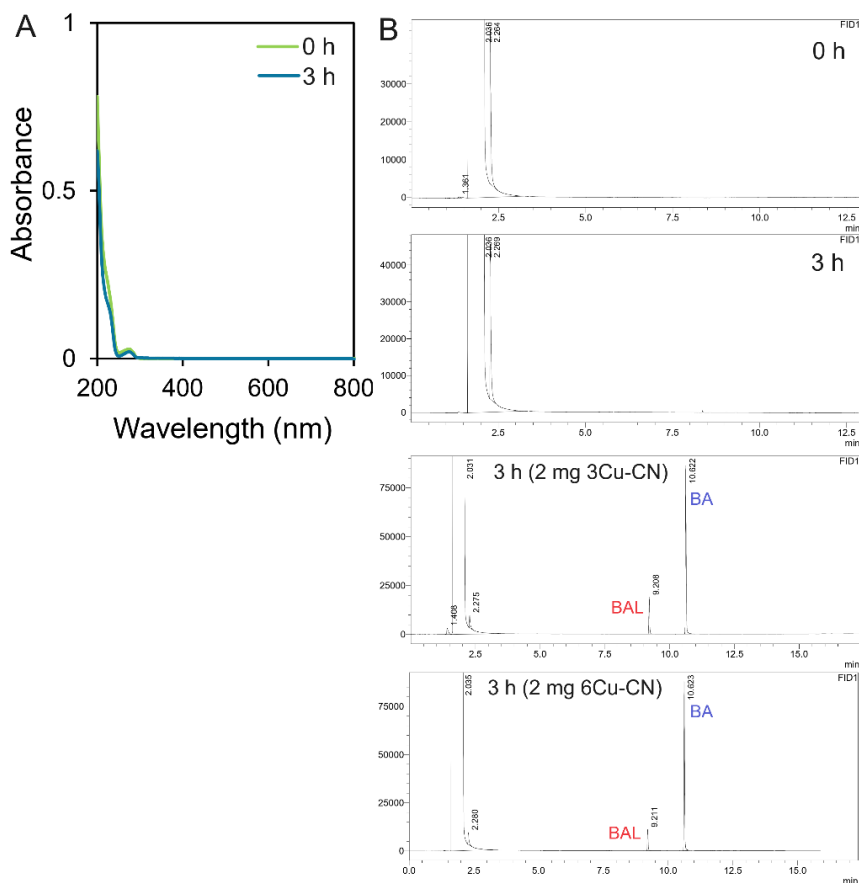

**Figure S5.** (A) UV-Vis absorption and (B) gas chromatogram of fresh acetonitrile and after being exposed to visible light for 3 h without photocatalyst. Chromatograms of the reaction medium after 3 h of light irradiation with Cu-CN samples, where BAL is the only reaction product present, are also shown.

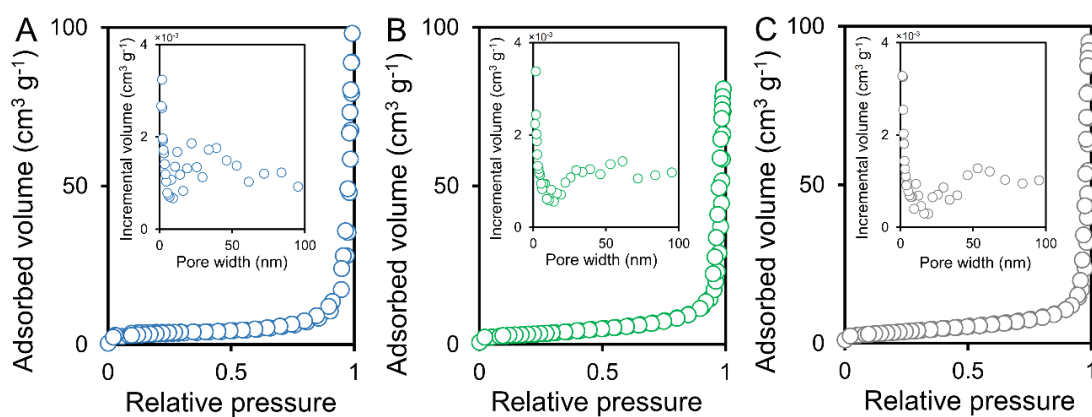

**Figure S6.**  $N_2$  adsorption-desorption isotherms of (A) CN, (B) 3Cu-CN, and (C) 6Cu-CN. The insets are the corresponding pore-size distribution curves.

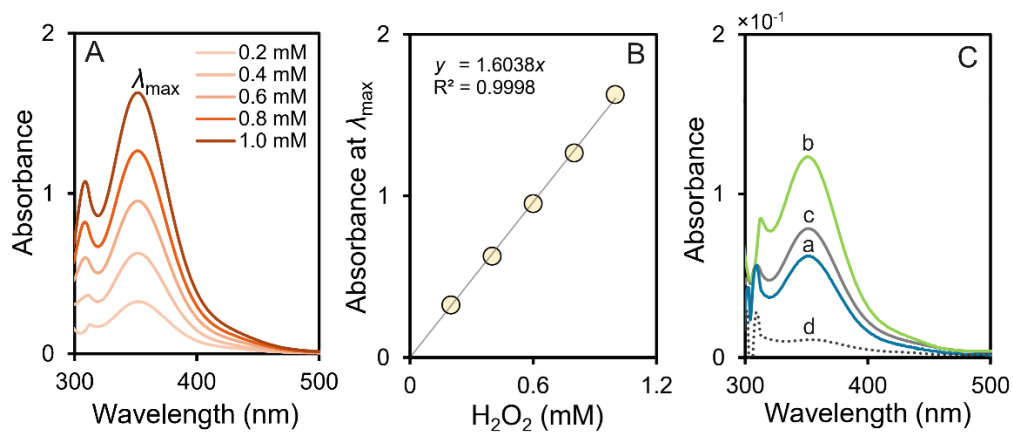

**Figure S7.** (A) UV-Vis absorption intensity of different standard concentrations of  $\text{H}_2\text{O}_2$  determined using the iodometric method. (B) Linear fitting for standard  $\text{H}_2\text{O}_2$  concentrations. (C) UV-Vis absorption spectra for (a) CN, (b) 3Cu-CN, (c) 6Cu-CN, and (d) BA in acetonitrile under light exposure without photocatalyst.

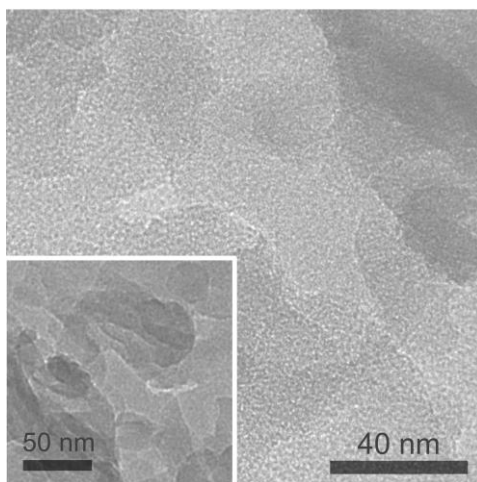

**Figure S8.** TEM images of 6Cu-CN.

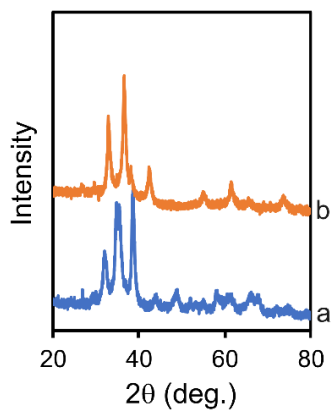

**Figure S9.** XRD patterns of (a)  $\text{Cu}_2\text{O}$  and (b)  $\text{CuO}$ .

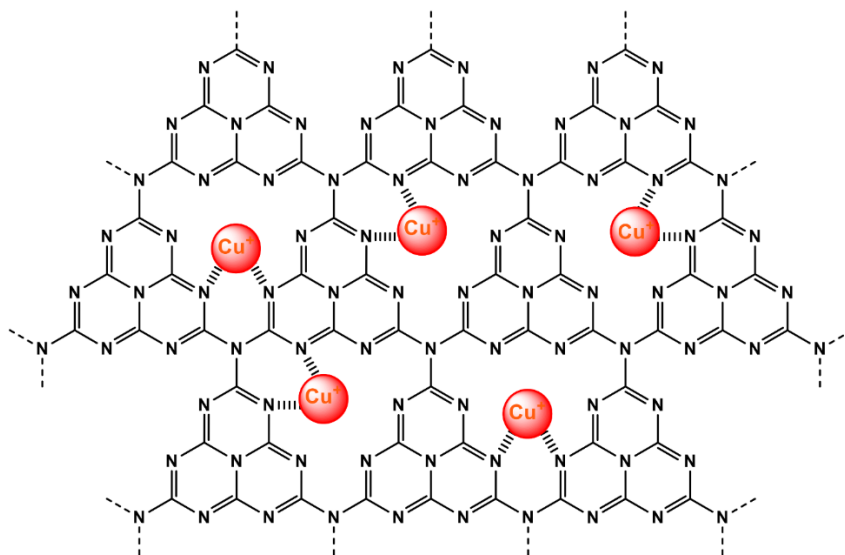

**Figure S10.** Proposed structure of a heptazine-based layer with low-coordinated  $\text{Cu}^+$  cations in 3Cu-CN. Based on the AIMD simulation, the gCN layer is not planar at 27 °C but irregularly curved, making its cavities (and thus the length of the Cu-N coordination) unsymmetrical and the Cu-N coordination to exist in more than one configuration.

**Table S1.** Partial oxidation of benzyl alcohol over gC<sub>3</sub>N<sub>4</sub>-based photocatalysts

| Catalyst                                                       | Precursor <sup>a</sup> | S <sub>BET</sub><br>(m <sup>2</sup> g <sup>-1</sup> ) | Con.<br>(g L <sup>-1</sup> ) | Light source                             | <i>t</i> (h) | <i>T</i> (°C) | BA con. (mmol L <sup>-1</sup> )                             | BA conv.<br>(%) | BAL sel.<br>(%) <sup>b</sup> | Yield-to-Power ratio<br>(mmol BAL g <sup>-1</sup> h <sup>-1</sup> W <sup>-1</sup> ) | Ref.      |
|----------------------------------------------------------------|------------------------|-------------------------------------------------------|------------------------------|------------------------------------------|--------------|---------------|-------------------------------------------------------------|-----------------|------------------------------|-------------------------------------------------------------------------------------|-----------|
| P-gC <sub>3</sub> N <sub>4</sub>                               | Melamine               | 4                                                     | 0.33                         | Fluorescent lamps (3 × 15 W, 340-420 nm) | 4            | 25            | 500 (acetonitrile)                                          | 5               | 52                           | 0.21                                                                                | [1]       |
| P-gC <sub>3</sub> N <sub>4</sub>                               | Urea                   | 16                                                    |                              |                                          |              |               |                                                             | 4               | 45                           | 0.15                                                                                |           |
| P-gC <sub>3</sub> N <sub>4</sub>                               | Thiourea               | 28                                                    |                              |                                          |              |               |                                                             | 3               | 36                           | 0.09                                                                                |           |
| Pt@gC <sub>3</sub> N <sub>4</sub>                              | Melamine               | 6                                                     | 0.625                        | Xe lamp (200 W, ≥420 nm,                 | 5            | <i>n.a.</i>   | 10 (water)                                                  | 27              | 90                           | <0.01                                                                               | [2]       |
| P/gC <sub>3</sub> N <sub>4</sub>                               | Urea                   | <i>n.a.</i>                                           | 2                            | LED lamp (64 W, 465 nm)                  | 10           | 25            | 50 (acetonitrile, O <sub>2</sub> )                          | 96              | >99                          | 0.04                                                                                | [3]       |
| gC <sub>3</sub> N <sub>4</sub>                                 | Melamine               | <i>n.a.</i>                                           | 0.67                         | Fluorescent lamps (6 × 15 W, 315-400 nm) | 4            | 25            | 0.5 (water)                                                 | 29              | 88                           | <0.01                                                                               | [4]       |
| gC <sub>3</sub> N <sub>4</sub>                                 | Cyanamide              | 130                                                   | 2.5                          | Xe lamp (300 W, >420 nm)                 | 3            | 100           | 40 (water, 0.8 MPa O <sub>2</sub> )                         | 10              | 96                           | <0.01                                                                               | [5]       |
| CdS/gC <sub>3</sub> N <sub>4</sub>                             | Melamine               | 7                                                     | 6.67                         | Xe lamp (300 W, >420 nm)                 | 4            | 60            | 25.5 (benzotrifluoride, 0.5 MPa N <sub>2</sub> )            | 48              | 93                           | <0.01                                                                               | [6]       |
| S-gC <sub>3</sub> N <sub>4</sub>                               | Dicyandiamide          | 66                                                    | 5                            | Xe lamp (300 W, >420 nm)                 | 4            | 100           | 100 (trifluorotoluene, 0.1 MPa O <sub>2</sub> )             | 19              | >99                          | <0.01                                                                               | [7]       |
| gC <sub>3</sub> N <sub>4</sub>                                 | Cyanamide              | 200                                                   | 5                            | Xe lamp (300 W, >420 nm)                 | 3            | 100           | 100 (acetonitrile, 0.8 MPa O <sub>2</sub> )                 | 70              | 68                           | 0.01                                                                                | [8]       |
| NHPI/gC <sub>3</sub> N <sub>4</sub> *                          | Cyanamide              | <i>n.a.</i>                                           | 10                           | W-filament bulb (250 W, >420 nm)         | 22           | 25            | 500 (toluene, 5 mL min <sup>-1</sup> O <sub>2</sub> )       | 89              | 94                           | <0.01                                                                               | [9]       |
| gC <sub>3</sub> N <sub>4</sub>                                 | Melamine               | <i>n.a.</i>                                           | 3.75                         | Hg lamp (100 W, >400 nm)                 | 3            | 25            | 25 (water, O <sub>2</sub> )                                 | 96              | 82                           | 0.02                                                                                | [10]      |
| gC <sub>3</sub> N <sub>4</sub>                                 | Melamine               | 43                                                    | 1.67                         | LED lamps (18 × 1 W, 395 nm)             | 5            | 20            | 2 (acetonitrile)                                            | 77              | 87                           | <0.01                                                                               | [11]      |
| gC <sub>3</sub> N <sub>4</sub>                                 | Urea                   | 53                                                    |                              |                                          |              |               |                                                             | 85              | 85                           | <0.01                                                                               |           |
| Fe@gC <sub>3</sub> N <sub>4</sub>                              | Melamine               | <i>n.a.</i>                                           | 2.5                          | LED lamp (18 W, >400 nm)                 | 3            | 25            | 200 (acetonitrile, 3 mL H <sub>2</sub> O <sub>2</sub> )     | 93              | >99                          | 1.36                                                                                | [12]      |
| MIL/Ag/gC <sub>3</sub> N <sub>4</sub>                          | Melamine               | 101                                                   | 0.83                         | Xe lamp (500 W, >400 nm)                 | 6            | 25            | 33.4 (water, O <sub>2</sub> )                               | 47              | 97                           | <0.01                                                                               | [13]      |
| TiO <sub>2</sub> /gC <sub>3</sub> N <sub>4</sub>               | Urea                   | 68                                                    | 2.5                          | Xe lamp (400 W, >400 nm)                 | 4            | 50            | 100 (acetonitrile, O <sub>2</sub> )                         | 42              | >99                          | 0.01                                                                                | [14]      |
| Ru@B-gC <sub>3</sub> N <sub>4</sub>                            | Melamine               | 2.5                                                   | 0.5                          | UVA lamp (2×18 W, 365 nm)                | 3            | 20            | 0.5 (water)                                                 | 83              | 57                           | <0.01                                                                               | [15]      |
| Fe <sub>2</sub> O <sub>3</sub> /gC <sub>3</sub> N <sub>4</sub> | Melamine               | 27                                                    | 1                            | Hg lamp (125 W, 365 nm)                  | 4            | 30            | 100 (acetonitrile, 25 mL min <sup>-1</sup> O <sub>2</sub> ) | 20              | 34                           | 0.01                                                                                | [16]      |
| ZnO/gC <sub>3</sub> N <sub>4</sub>                             | Melamine               | 10                                                    |                              |                                          |              |               |                                                             | 9               | 26                           | <0.01                                                                               |           |
| Cu@gC <sub>3</sub> N <sub>4</sub>                              | Dicyandiamide          | 13                                                    | 0.5                          | LED lamp (0.45 W, 465 nm)                | 3            | 25            | 1 (acetonitrile)                                            | 25              | 96                           | 0.35                                                                                | This work |

\*N-hydroxyphthalimide (NHPI). <sup>a</sup>Precursor for the gC<sub>3</sub>N<sub>4</sub>. <sup>b</sup>Selectivity to BAL. <sup>c</sup>Not available.

**Table S2.** Recycling tests for the BA oxidation

| Photocatalyst | Cycle                      | BA conv. (%) | BAL yield (%) | BAL sel. (%) |
|---------------|----------------------------|--------------|---------------|--------------|
| CN            | 1                          | 15           | 3             | 20           |
|               | 2                          | 16           | 3             | 19           |
|               | 3                          | 15           | 2             | 13           |
|               | 4                          | 13           | 2             | 15           |
|               | <i>Stored for 8 months</i> | 18           | 3             | 17           |
| 3Cu-CN        | 1                          | 25           | 24            | 96           |
|               | 2                          | 24           | 22            | 92           |
|               | 3                          | 25           | 24            | 96           |
|               | 4                          | 28           | 25            | 90           |
|               | <i>Stored for 8 months</i> | 28           | 26            | 93           |
| 6Cu-CN        | 1                          | 21           | 17            | 81           |
|               | 2                          | 20           | 16            | 80           |
|               | 3                          | 20           | 17            | 85           |
|               | 4                          | 18           | 14            | 78           |
|               | <i>Stored for 8 months</i> | 20           | 16            | 80           |

Reaction conditions: BA (1 mmol L<sup>-1</sup>, 0.01 mmol), photocatalyst (0.5 g L<sup>-1</sup>, 5 mg), and reaction time (3 h).

**Table S3.** Partial oxidation of BA over CN in the presence of scavengers

| Scavenger                       | BA conv. (%) | BAL yield (%) | BAL sel. (%) |
|---------------------------------|--------------|---------------|--------------|
| none                            | 15           | 3             | 20           |
| AgNO <sub>3</sub>               | 13           | 2             | 15           |
| Na <sub>2</sub> SO <sub>4</sub> | 12           | 2             | 17           |
| KI                              | 14           | 2             | 14           |
| BQ                              | 10           | 1             | 10           |
| <i>t</i> -butanol               | 15           | 3             | 20           |

Reaction conditions: BA (1 mmol L<sup>-1</sup>, 0.01 mmol), scavenger (5 mmol L<sup>-1</sup>, 0.05 mmol), photocatalyst (0.5 g L<sup>-1</sup>, 5 mg), and reaction time (3 h).

**Table S4.** Partial oxidation of BA over 3Cu-CN in the presence of scavengers

| Scavenger                       | BA conv. (%) | BAL yield (%) | BAL sel. (%) |
|---------------------------------|--------------|---------------|--------------|
| none                            | 25           | 24            | 96           |
| AgNO <sub>3</sub>               | 18           | 15            | 83           |
| Na <sub>2</sub> SO <sub>4</sub> | 22           | 18            | 82           |
| KI                              | 13           | 10            | 77           |
| BQ                              | 20           | 16            | 80           |
| <i>t</i> -butanol               | 24           | 22            | 92           |

Reaction conditions: BA (1 mmol L<sup>-1</sup>, 0.01 mmol), scavenger (5 mmol L<sup>-1</sup>, 0.05 mmol), photocatalyst (0.5 g L<sup>-1</sup>, 5 mg), and reaction time (3 h).

**Table S5.** Partial oxidation of BA over 6Cu-CN in the presence of scavengers

| Scavenger                       | BA conv. (%) | BAL yield (%) | BAL sel. (%) |
|---------------------------------|--------------|---------------|--------------|
| none                            | 21           | 17            | 81           |
| AgNO <sub>3</sub>               | 16           | 11            | 69           |
| Na <sub>2</sub> SO <sub>4</sub> | 19           | 14            | 73           |
| KI                              | 18           | 12            | 67           |
| BQ                              | 18           | 13            | 72           |
| <i>t</i> -butanol               | 20           | 16            | 80           |

Reaction conditions: BA (1 mmol L<sup>-1</sup>, 0.01 mmol), scavenger (5 mmol L<sup>-1</sup>, 0.05 mmol), photocatalyst (0.5 g L<sup>-1</sup>, 5 mg), and reaction time (3 h).



**Table S6.** Partial oxidation of BA in the presence of hole scavengers

| Scavenger | Photocatalyst | BA conv. (%) | BAL yield (%) | BAL sel. (%) |
|-----------|---------------|--------------|---------------|--------------|
| none      | CN            | 15           | 3             | 20           |
|           | 3Cu-CN        | 25           | 24            | 96           |
|           | 6Cu-CN        | 21           | 17            | 81           |
| KI        | CN            | 14           | 2             | 14           |
|           | 3Cu-CN        | 13           | 10            | 77           |
|           | 6Cu-CN        | 18           | 12            | 67           |
| TEMPO     | CN            | 12           | 2             | 17           |
|           | 3Cu-CN        | 7            | 6             | 85           |
|           | 6Cu-CN        | 7            | 5             | 71           |
| OA        | CN            | 13           | 2             | 15           |
|           | 3Cu-CN        | 14           | 13            | 93           |
|           | 6Cu-CN        | 15           | 12            | 80           |

Reaction conditions: BA (1 mmol L<sup>-1</sup>, 0.01 mmol), scavenger (5 mmol L<sup>-1</sup>, 0.05 mmol), photocatalyst (0.5 g L<sup>-1</sup>, 5 mg), and reaction time (3 h).

**Table S7.** Partial oxidation of BA over 3Cu-CN with different reaction conditions

| Scavenger(s) | Concentration (mmol L <sup>-1</sup> )                                               | BA conv. (%) | BAL yield (%) | BAL sel. (%) |
|--------------|-------------------------------------------------------------------------------------|--------------|---------------|--------------|
| BQ           | 0                                                                                   | 25           | 24            | 96           |
|              | 0 (O <sub>2</sub> flow, 25 mL min <sup>-1</sup> , 1 h)                              | 30           | 26            | 87           |
|              | 0 (Ultrasonic degassing, 0.5 h, followed by Ar flow, 25 mL min <sup>-1</sup> , 1 h) | 19           | 16            | 84           |
|              | 2                                                                                   | 21           | 17            | 81           |
|              | 4                                                                                   | 19           | 17            | 89           |
|              | 8                                                                                   | 16           | 14            | 87           |
|              | BQ + KI                                                                             | 4 + 4        | 3             | 0            |
| BQ + TEMPO   | 4 + 4                                                                               | 0            | 0             | 0            |
| BQ + OA      | 4 + 4                                                                               | 6            | 4             | 67           |

Reaction conditions: BA (1 mmol L<sup>-1</sup>, 0.01 mmol), photocatalyst (0.5 g L<sup>-1</sup>, 5 mg), and reaction time (3 h).

**Table S8.** H<sub>2</sub>O<sub>2</sub> production determined based on the iodometric method [17-19]

| $\text{H}_2\text{O}_2 + 3\text{I}^- + 2\text{H}^+ \rightarrow \text{I}_3^- + 2\text{H}_2\text{O}$ |               |                                                     |                                                                              |      |
|---------------------------------------------------------------------------------------------------|---------------|-----------------------------------------------------|------------------------------------------------------------------------------|------|
|                                                                                                   | Photocatalyst | H <sub>2</sub> O <sub>2</sub> (μM h <sup>-1</sup> ) | Yield-to-Power ratio (mmol g <sup>-1</sup> h <sup>-1</sup> W <sup>-1</sup> ) | Ref. |
| No light                                                                                          | CN            | 0                                                   | 0                                                                            |      |
| No catalyst                                                                                       | -             | 2                                                   | 1                                                                            |      |
|                                                                                                   | CN            | 13                                                  | 9                                                                            |      |
|                                                                                                   | 3Cu-CN        | 25                                                  | 17                                                                           |      |
|                                                                                                   | 6Cu-CN        | 16                                                  | 11                                                                           |      |
|                                                                                                   | Ni-CN         | 342                                                 | 236                                                                          | [17] |

Reaction conditions: BA (1 mmol L<sup>-1</sup>, 0.01 mmol), photocatalyst (0.5 g L<sup>-1</sup>, 5 mg), visible light 300 mW at 465 nm, and reaction time (3 h).

## References

- Bellardita M, García-López EI, Marci G, Krivtsov I, García JR, Palmisano L: **Selective photocatalytic oxidation of aromatic alcohols in water by using P-doped g-C<sub>3</sub>N<sub>4</sub>**. *Applied Catalysis B: Environmental* 2018, **220**:222-233.
- Huo T, Deng Q, Yu F, Wang G, Xia Y, Li H, Hou W: **Ion-Induced Synthesis of Crystalline Carbon Nitride Ultrathin Nanosheets from Mesoporous Melon for Efficient Photocatalytic Hydrogen Evolution with Synchronous Highly Selective Oxidation of Benzyl Alcohol**. *ACS Applied Materials & Interfaces* 2022, **14**(11):13419-13430.

3. Pahari SK, Doong R-A: **Few-layered phosphorene–graphitic carbon nitride nanoheterostructure as a metal-free photocatalyst for aerobic oxidation of benzyl alcohol and toluene.** *ACS Sustainable Chemistry & Engineering* 2020, **8**(35):13342-13351.
4. Krivtsov I, Ilkaeva M, García-López EI, Marci G, Palmisano L, Bartashevich E, Grigoreva E, Matveeva K, Díaz E, Ordóñez S: **Effect of substituents on partial photocatalytic oxidation of aromatic alcohols assisted by polymeric C<sub>3</sub>N<sub>4</sub>.** *ChemCatChem* 2019, **11**(11):2713-2724.
5. Long B, Ding Z, Wang X: **Carbon nitride for the selective oxidation of aromatic alcohols in water under visible light.** *ChemSusChem* 2013, **6**(11):2074-2078.
6. Dai X, Xie M, Meng S, Fu X, Chen S: **Coupled systems for selective oxidation of aromatic alcohols to aldehydes and reduction of nitrobenzene into aniline using CdS/g-C<sub>3</sub>N<sub>4</sub> photocatalyst under visible light irradiation.** *Applied Catalysis B: Environmental* 2014, **158**:382-390.
7. Zhang L, Liu D, Guan J, Chen X, Guo X, Zhao F, Hou T, Mu X: **Metal-free g-C<sub>3</sub>N<sub>4</sub> photocatalyst by sulfuric acid activation for selective aerobic oxidation of benzyl alcohol under visible light.** *Materials Research Bulletin* 2014, **59**:84-92.
8. Su F, Mathew SC, Lipner G, Fu X, Antonietti M, Blechert S, Wang X: **mpg-C<sub>3</sub>N<sub>4</sub>-catalyzed selective oxidation of alcohols using O<sub>2</sub> and visible light.** *Journal of the American Chemical Society* 2010, **132**(46):16299-16301.
9. Zhang P, Deng J, Mao J, Li H, Wang Y: **Selective aerobic oxidation of alcohols by a mesoporous graphitic carbon nitride/N-hydroxyphthalimide system under visible-light illumination at room temperature.** *Chinese Journal of Catalysis* 2015, **36**(9):1580-1586.
10. Shvalagin V, Kompanets M, Kutsenko O, Kuchmy SY, Skoryk M: **Photocatalytic Activity of gC<sub>3</sub>N<sub>4</sub> in the Partial Oxidation of Benzyl Alcohol Under Visible Light.** *Theoretical and Experimental Chemistry* 2020, **56**:111-116.
11. Morozov R, Golovin M, Uchaev D, Fakhrutdinov A, Gavrilyak M, Arkhipushkin I, Boronin V, Korshunov V, Podgornov F, Taydakov I: **Polytriazine imide-LiCl semiconductor for highly efficient photooxidation of benzyl alcohol to benzaldehyde.** *Journal of Chemical Sciences* 2021, **133**:1-17.
12. Devi M, Ganguly S, Bhuyan B, Dhar SS, Vadivel S: **A novel [Fe (acac)<sub>3</sub>] interspersed g-C<sub>3</sub>N<sub>4</sub> heterostructure for environmentally benign visible-light-driven oxidation of alcohols.** *European Journal of Inorganic Chemistry* 2018, **2018**(44):4819-4825.
13. Yang Z, Xu X, Liang X, Lei C, Cui Y, Wu W, Yang Y, Zhang Z, Lei Z: **Construction of heterostructured MIL-125/Ag/g-C<sub>3</sub>N<sub>4</sub> nanocomposite as an efficient bifunctional visible light photocatalyst for the organic oxidation and reduction reactions.** *Applied catalysis B: environmental* 2017, **205**:42-54.
14. Mohammadi M, Hadadzadeh H, Kaikhosravi M, Farrokhpour H, Shakeri J: **Selective photocatalytic oxidation of benzyl alcohol at ambient conditions using spray-dried g-C<sub>3</sub>N<sub>4</sub>/TiO<sub>2</sub> granules.** *Molecular Catalysis* 2020, **490**:110927.
15. Solís RR, Quintana MA, Blázquez G, Calero M, Muñoz-Batista MJ: **Ruthenium deposited onto graphitic carbon modified with boron for the intensified photocatalytic production of benzaldehyde.** *Catalysis Today* 2023, **423**:114266.
16. Cerdan K, Ouyang W, Colmenares JC, Munoz-Batista MJ, Luque R, Balu AM: **Facile mechanochemical modification of g-C<sub>3</sub>N<sub>4</sub> for selective photo-oxidation of benzyl alcohol.** *Chemical Engineering Science* 2019, **194**:78-84.
17. Zhang X, Su H, Cui P, Cao Y, Teng Z, Zhang Q, Wang Y, Feng Y, Feng R, Hou J: **Developing Ni single-atom sites in carbon nitride for efficient photocatalytic H<sub>2</sub>O<sub>2</sub> production.** *Nature Communications* 2023, **14**(1):7115.
18. Zhang X, Ma P, Wang C, Gan L, Chen X, Zhang P, Wang Y, Li H, Wang L, Zhou X: **Unraveling the dual defect sites in graphite carbon nitride for ultra-high photocatalytic H<sub>2</sub>O<sub>2</sub> evolution.** *Energy & Environmental Science* 2022, **15**(2):830-842.
19. Wei Z, Liu M, Zhang Z, Yao W, Tan H, Zhu Y: **Efficient visible-light-driven selective oxygen reduction to hydrogen peroxide by oxygen-enriched graphitic carbon nitride polymers.** *Energy & Environmental Science* 2018, **11**(9):2581-2589.

20. Bhoyar T, Abraham BM, Gupta A, Kim DJ, Manwar NR, Pasupuleti KS, Vidyasagar D, Umare SS: **Counterion chemistry of 5-halo (X: Cl, Br, I)-uracil derived carbon nitride: unlocking enhanced photocatalytic performance.** *Journal of Materials Chemistry A* 2024, **12**(2):979-992.
